# Supplementary material for: Complete three-dimensional structures of the Lon protease translocating a protein substrate
Source: PubMed Central journal article supplement — Sci Adv. 2021 Oct 15;7(42):eabj7835. doi: 10.1126/sciadv.abj7835 (PMC8519571; doi:10.1126/sciadv.abj7835), 2021-10-15
Supplement: sciadv.abj7835_sm.pdf [file sciadv.abj7835_sm.pdf]

## Supplementary Materials for

### **Complete three-dimensional structures of the Lon protease translocating a protein substrate**

Shanshan Li, Kan-Yen Hsieh, Chiao-I Kuo, Szu-Hui Lee,  
Grigore D. Pintilie, Kaiming Zhang\*, Chung-I Chang\*

\*Corresponding author. Email: kmzhang@ustc.edu.cn (K.Z.); chungi@gate.sinica.edu.tw (C.-I.C.)

Published 15 October 2021, *Sci. Adv.* **7**, eabj7835 (2021)  
DOI: 10.1126/sciadv.abj7835

#### **The PDF file includes:**

Figs. S1 to S6  
Legends for movies S1 and S2  
Tables S1 and S2

#### **Other Supplementary Material for this manuscript includes the following:**

Movies S1 and S2

A

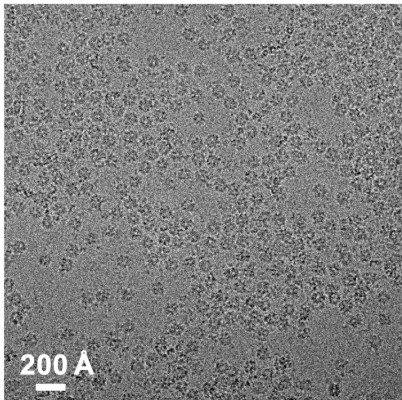

B

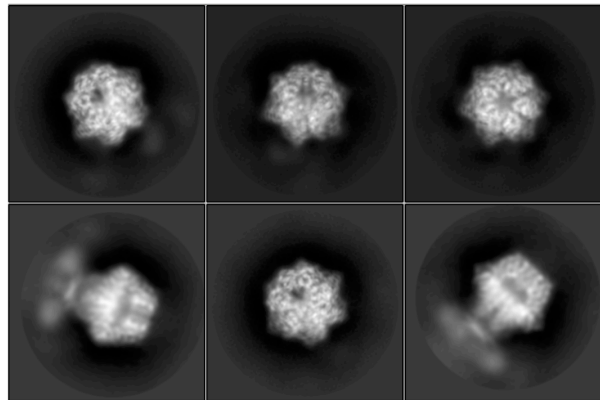

C

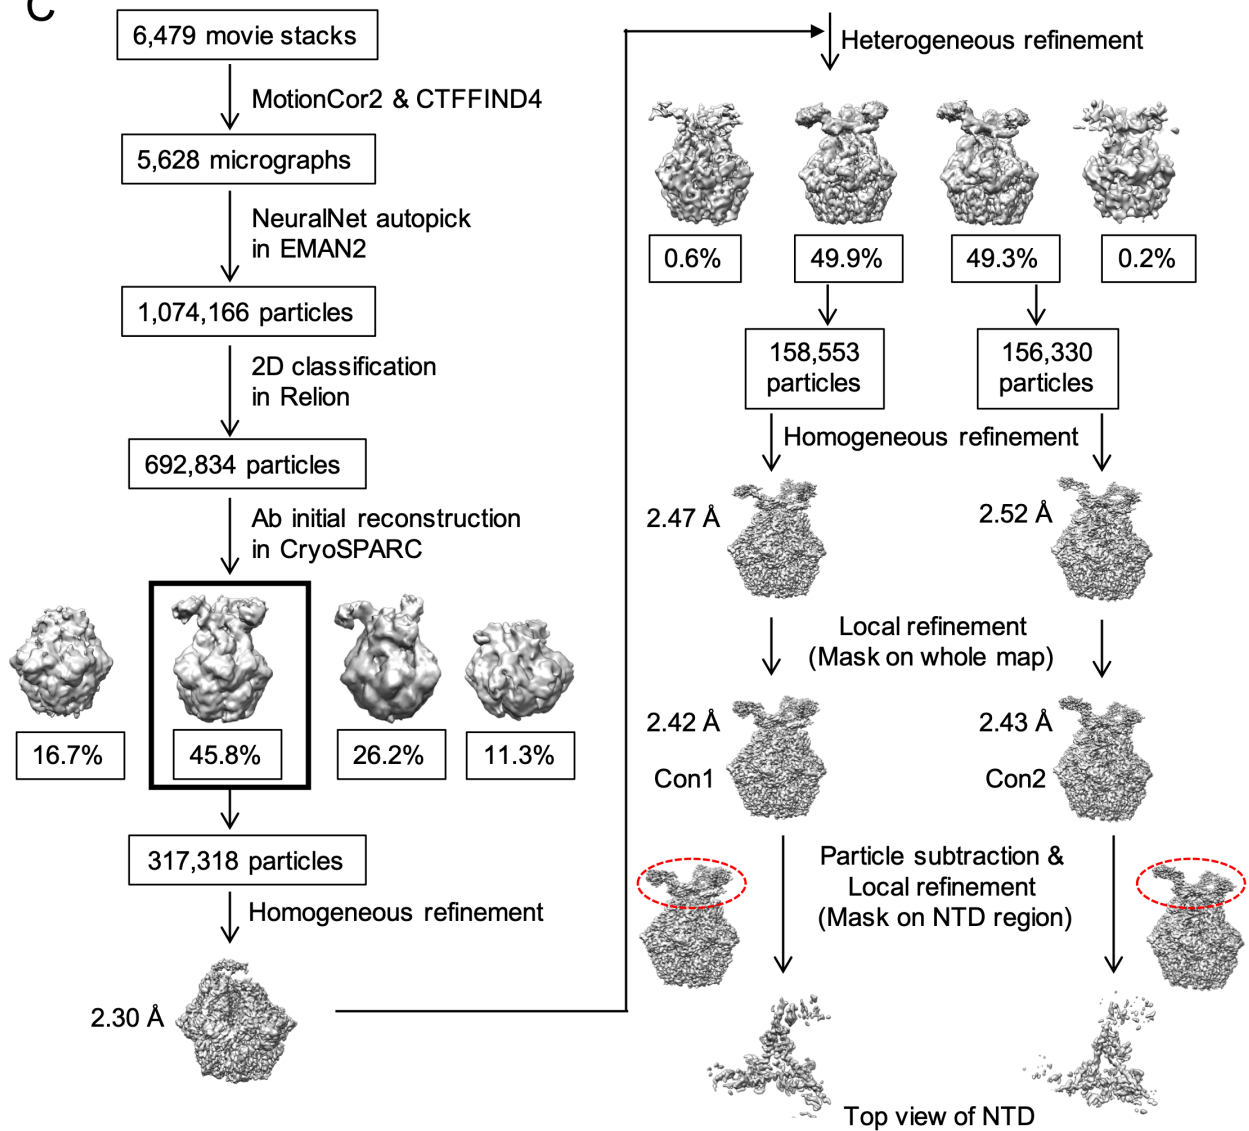

**Fig. S1. Single-particle cryo-EM analysis of substrate-engaged MtaLon.** (A) Representative motion-corrected cryo-EM micrograph. (B) Reference-free 2D class averages. (C) Workflow of the data processing.

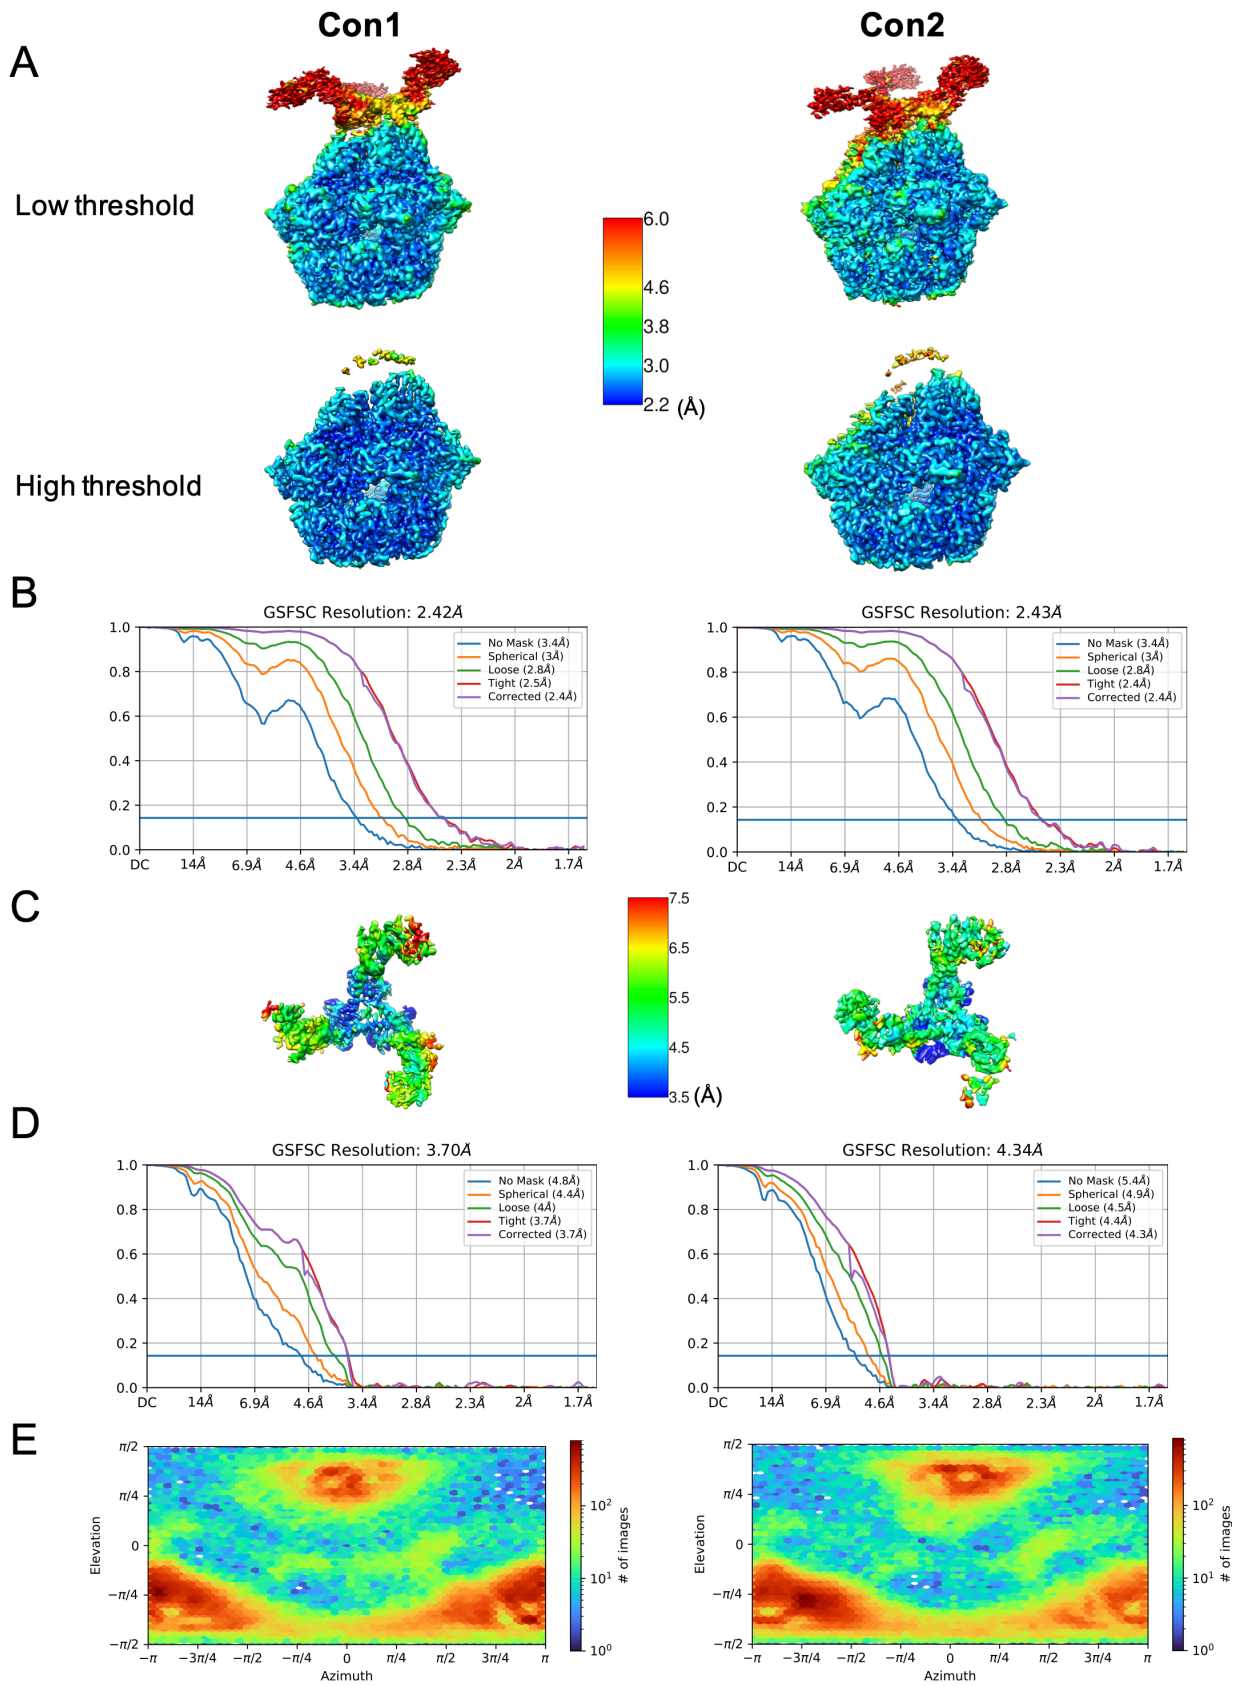

**Fig. S2. Evaluation of the final 3D reconstructions of substrate-engaged MtaLon. (A)**

Resolution maps for the final 3D reconstructions of Con1 (left) and Con2 (right), shown at two different thresholds. **(B)** Gold standard FSC plots for the 3D reconstructions of Con1 (left) and Con2 (right), calculated in cryoSPARC. **(C)** Resolution maps for the 3D reconstructions of NTD from Con1 (left) and Con2 (right). **(D)** Gold standard FSC plots for the 3D reconstructions of NTD from Con1 (left) and Con2 (right). **(E)** Euler angle distribution of the particle images.

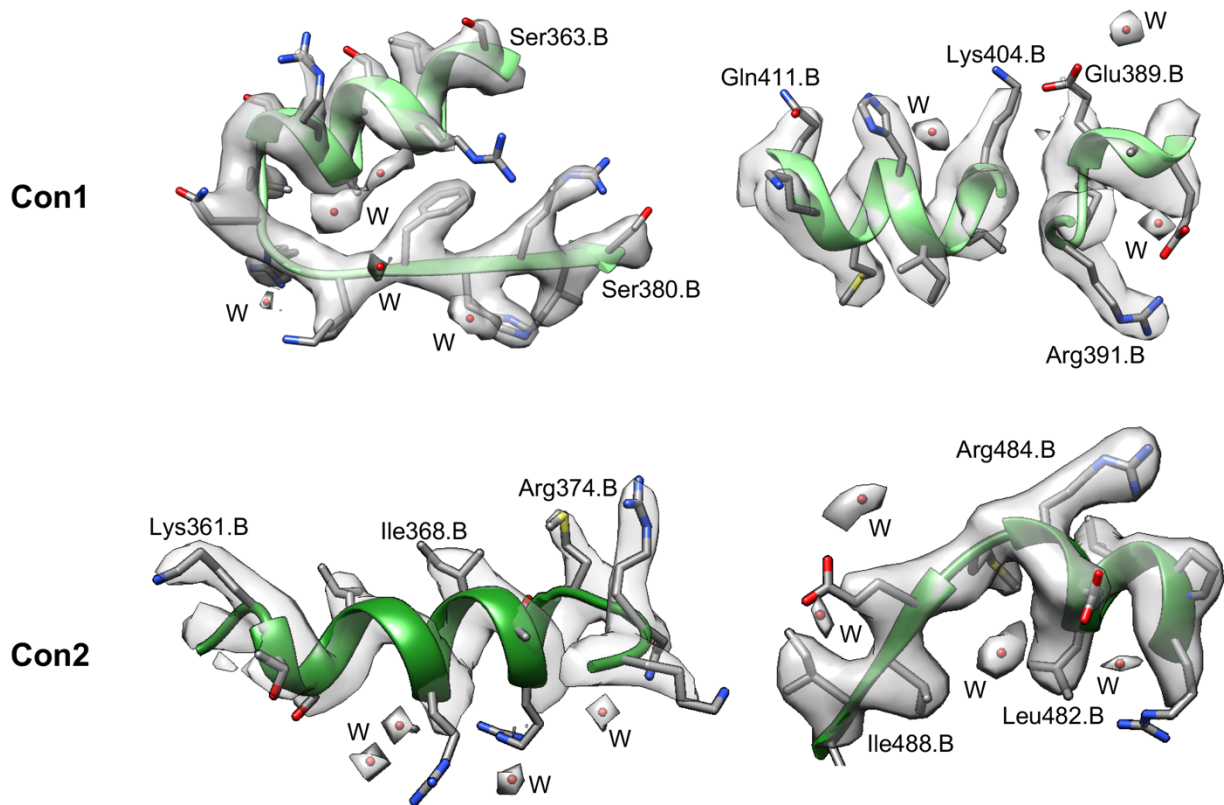

**Fig. S3. Selected regions of the high-resolution maps showing good resolvability for water molecules.** The model is shown as ribbon, with water molecules (W) indicated. Some side chains, shown in sticks, are labelled by residue name and number, followed by the chain ID.

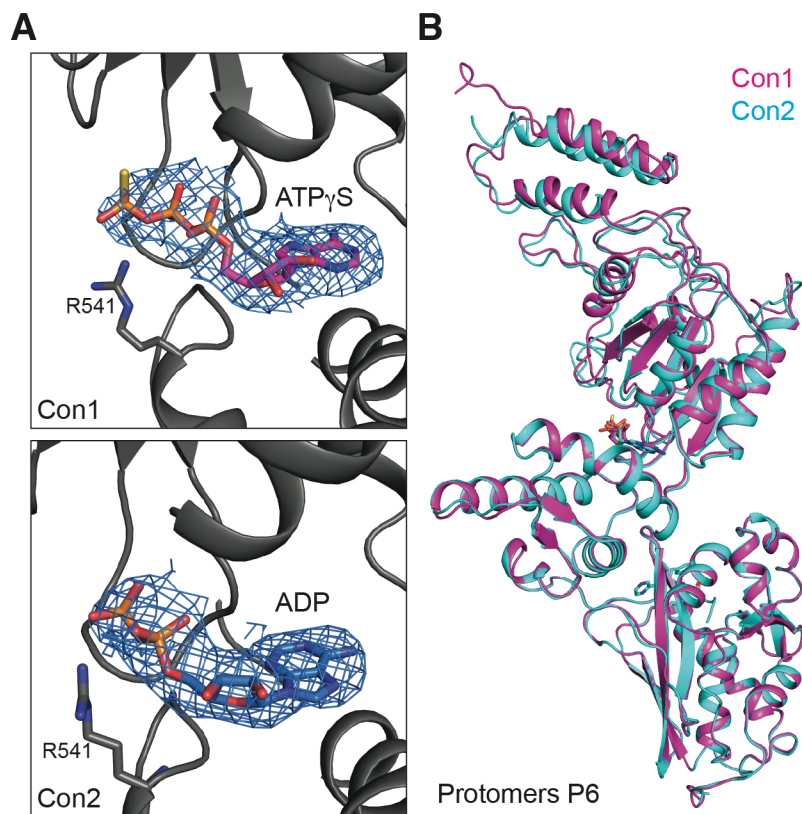

**Fig. S4. Nucleotide binding in the non-engaging protomer P6.** (A) Cryo-EM maps, contoured at  $5.15 \sigma$ , and molecular model of the bound nucleotide in the non-engaging protomers P6 (chain F) in Con1 (ATP $\gamma$ S; top) and Con2 (ADP; bottom) structures. The sensor-II residue Arg541 is also shown. (B) Superimposition of the structures of the P6 protomers in Con1 and Con2, with an RMSD value of  $1.09 \text{ \AA}$ , based on C $\alpha$  atoms of residues 245-780.

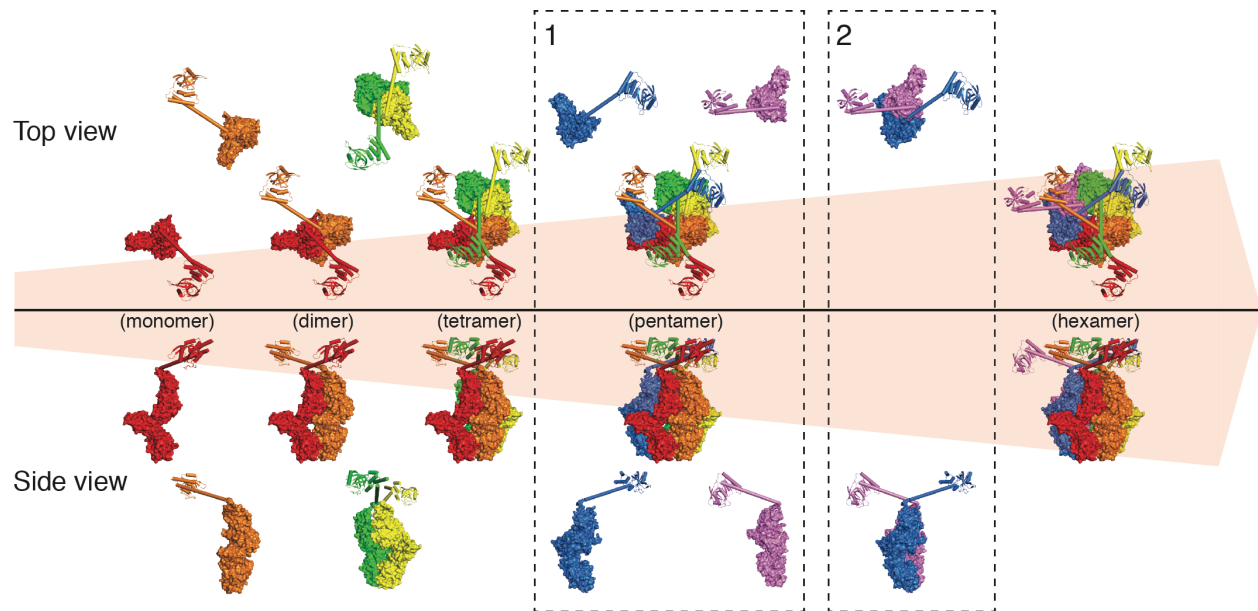

**Fig. S5. Proposed model for the sequential assembly of Lon protein complex.** Schematic diagram showing assembly of a Lon homo-hexamer with interlocked N-terminal helices. The proposed process involves monomers and Ac-Ob-paired dimers. Surface representations of the protomers with rainbow coloring (from red to violet) are used to depict a sequential assembly, which proceeds from left to right as denoted by the background light pink arrow. The numbered dashed boxes represent two alternative pathways to assembling a hexamer from a tetramer.



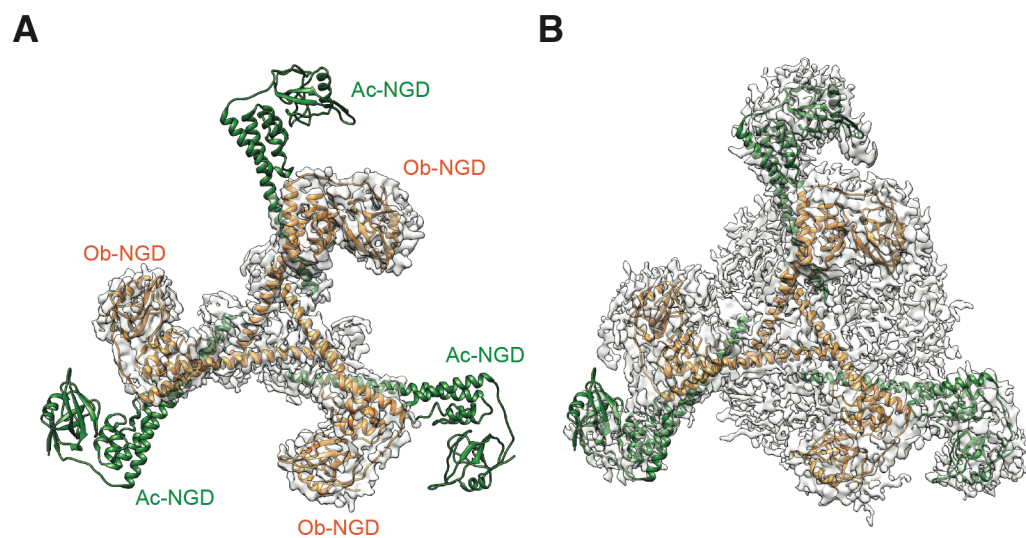

**Fig. S6. The flexibility of the six N-terminal globular domains (NGDs).** (A) Top view of the model and the focused refined map, with contour threshold value 0.35, showing the three flexible Ob-NGDs. (B) Top view of the model and the map, with contour threshold value 0.15, showing the location of three highly flexible Ac-NGDs.

**Movie S1. Main features of cryo-EM Map1 and the reconstructed structure of Con1.** The map and structure are shown to emphasize the features of full-length *Meiothermus taiwanensis* Lon protease (LonA) bound to  $\alpha$ -casein.

**Movie S2. Conformational changes associated with the ATP-hydrolysis cycle of full-length ATP-dependent Lon (LonA).** The movie shows how the conformational states associated with the ATPase cycles are extrapolated based on the cryo-EM structures of Con1 and Con2 with bound  $\alpha$ -casein, and how the conformational movement may drive substrate translocation.

**Table S1. Cryo-EM data collection, processing, and model validation**

|                                              | <b>MtaLon</b>                              |
|----------------------------------------------|--------------------------------------------|
| <b>Data collection and processing</b>        |                                            |
| Microscope                                   | Titan Krios G3i                            |
| Voltage (kV)                                 | 300                                        |
| Camera                                       | Thermo Fisher Falcon 4                     |
| Grids Type                                   | R1.2/1.3 Quantifoil copper grid (200 mesh) |
| Sample concentration                         | 0.5 mg/mL                                  |
| Magnification                                | 96,000×                                    |
| C2 aperture size ( $\mu\text{m}$ )           | 50                                         |
| Objective aperture size ( $\mu\text{m}$ )    | 100                                        |
| Pixel size ( $\text{\AA}$ )                  | 0.82                                       |
| Total exposure ( $\text{e}^-/\text{\AA}^2$ ) | 48                                         |
| Exposure time (s)                            | 5.8                                        |
| Number of frames per exposure                | 40                                         |
| Energy filter slit width (eV)                | N/A                                        |
| Data collection software                     | EPU 2.7                                    |
| Maximum image shift ( $\mu\text{m}$ )        | 6                                          |
| Number of exposures per hole                 | 6                                          |

|                                                     |                          |                          |
|-----------------------------------------------------|--------------------------|--------------------------|
| Defocus range ( $\mu\text{m}$ )                     | -0.5 - -1.7              |                          |
| Number of micrographs collected                     | 6,479                    |                          |
| Number of micrographs used                          | 5,628                    |                          |
| Number of initial particles                         | 1,074,166                |                          |
| Conformations                                       | <b>Con1</b>              | <b>Con2</b>              |
| Symmetry                                            | C1                       | C1                       |
| Number of final particles                           | 158,553                  | 156,330                  |
| Resolution (0.143 gold standard FSC, $\text{\AA}$ ) | 2.4                      | 2.4                      |
| Local resolution range ( $\text{\AA}$ )             | 2 - 6                    | 2 - 6                    |
| <b>Atomic model refinement</b>                      |                          |                          |
| Software                                            | phenix.real_space_refine | phenix.real_space_refine |
| Clashscore, all atoms                               | 6.05                     | 5.96                     |
| Poor rotamers (%)                                   | 0.38                     | 0.41                     |
| Favored rotamers (%)                                | 96.87                    | 96.26                    |
| Ramachandran outliers (%)                           | 0.30                     | 0.24                     |
| Ramachandran favored (%)                            | 93.27                    | 93.50                    |
| MolProbity score                                    | 1.77                     | 1.75                     |
| Bad bonds (%)                                       | 0.03                     | 0.04                     |
| Bad angles (%)                                      | 0.12                     | 0.09                     |

**Table S2. Primer list for site-directed mutagenesis**

| Primer Name     | Sequence (5' to 3')                                 |
|-----------------|-----------------------------------------------------|
| MtaLonA_M217A_F | CAG CGG GTC AAA GAA CAG GCG GAC ACC AAC CAG CGC GAG |
| MtaLonA_M217A_R | CTC GCG CTG GTT GGT GTC CGC CTG TTC TTT GAC CCG CTG |
| MtaLonA_M217S_F | CAG CGG GTC AAA GAA CAG TCG GAC ACC AAC CAG CGC GAG |
| MtaLonA_M217S_R | CTC GCG CTG GTT GGT GTC CGA CTG TTC TTT GAC CCG CTG |
| MtaLonA_M217L_F | CAG CGG GTC AAA GAA CAG CTG GAC ACC AAC CAG CGC GAG |
| MtaLonA_M217L_R | CTC GCG CTG GTT GGT GTC CAG CTG TTC TTT GAC CCG CTG |
| MtaLonA_M217Y_F | CAG CGG GTC AAA GAA CAG TAC GAC ACC AAC CAG CGC GAG |
| MtaLonA_M217Y_R | CTC GCG CTG GTT GGT GTC GTA CTG TTC TTT GAC CCG CTG |
| MtaLonA_Q221A_F | GAA CAG ATG GAC ACC AAC GCG CGC GAG TAC TAC CTG CGC |
| MtaLonA_Q221A_R | GCG CAG GTA GTA CTC GCG CGC GTT GGT GTC CAT CTG TTC |
| MtaLonA_Y224A_F | GAC ACC AAC CAG CGC GAG GCC TAC CTG CGC GAA CAG     |
| MtaLonA_Y224A_R | CTG TTC GCG CAG GTA GGC CTC GCG CTG GTT GGT GTC     |

|                 |                                                            |
|-----------------|------------------------------------------------------------|
| MtaLonA_Y224S_F | GAC ACC AAC CAG CGC GAG AGC TAC CTG CGC GAA CAG ATG<br>AAG |
| MtaLonA_Y224S_R | CTT CAT CTG TTC GCG CAG GTA GCT CTC GCG CTG GTT GGT<br>GTC |
| MtaLonA_Y224I_F | GAC ACC AAC CAG CGC GAG ATT TAC CTG CGC GAA CAG ATG<br>AAG |
| MtaLonA_Y224I_R | CTT CAT CTG TTC GCG CAG GTA AAT CTC GCG CTG GTT GGT<br>GTC |
| MtaLonA_Y224L_F | GAC ACC AAC CAG CGC GAG CTC TAC CTG CGC GAA CAG ATG        |
| MtaLonA_Y224L_R | CAT CTG TTC GCG CAG GTA GAG CTC GCG CTG GTT GGT GTC        |
| MtaLonA_Y224H_F | GAC ACC AAC CAG CGC GAG CAC TAC CTG CGC GAA CAG ATG        |
| MtaLonA_Y224H_R | CAT CTG TTC GCG CAG GTA GTG CTC GCG CTG GTT GGT GTC        |
| MtaLonA_Y224M_F | GAC ACC AAC CAG CGC GAG ATG TAC CTG CGC GAA CAG ATG        |
| MtaLonA_Y224M_R | CAT CTG TTC GCG CAG GTA CAT CTC GCG CTG GTT GGT GTC        |
| MtaLonA_Y224F_F | GAC ACC AAC CAG CGC GAG TTC TAC CTG CGC GAA CAG ATG        |
| MtaLonA_Y224F_R | CAT CTG TTC GCG CAG GTA GAA CTC GCG CTG GTT GGT GTC        |

|                                   |                                                                       |
|-----------------------------------|-----------------------------------------------------------------------|
| MtaLonA_Y224W_F                   | GAC ACC AAC CAG CGC GAG TGG TAC CTG CGC GAA CAG                       |
| MtaLonA_Y224W_R                   | CTG TTC GCG CAG GTA CCA CTC GCG CTG GTT GGT GTC                       |
| MtaLonA_Y225A_F                   | ACC AAC CAG CGC GAG TAC GCC CTG CGC GAA CAG ATG AAG                   |
| MtaLonA_Y225A_R                   | CTT CAT CTG TTC GCG CAG GGC GTA CTC GCG CTG GTT GGT                   |
| MtaLonA_Y225S_F                   | ACC AAC CAG CGC GAG TAC AGC CTG CGC GAA CAG ATG AAG                   |
| MtaLonA_Y225S_R                   | CTT CAT CTG TTC GCG CAG GCT GTA CTC GCG CTG GTT GGT                   |
| MtaLonA_Y225L_F                   | ACC AAC CAG CGC GAG TAC CTC CTG CGC GAA CAG ATG AAG                   |
| MtaLonA_Y225L_R                   | CTT CAT CTG TTC GCG CAG GAG GTA CTC GCG CTG GTT GGT                   |
| MtaLonA_L226A/M230A_F             | CGC GAG TAC TAC GCG CGC GAA CAG GCG AAG GCC ATC CAG                   |
| MtaLonA_L226A/M230A_R             | CTG GAT GGC CTT CGC CTG TTC GCG CGC GTA GTA CTC GCG                   |
| MtaLonA_M230A/I233A/L237A_F       | GAA CAG GCG AAG GCC GCC CAG AAA GAG GCG GGT GGC<br>GAG GAT G          |
| MtaLonA_M230A/I233A/L237A_R       | CAT CCT CGC CAC CCG CCT CTT TCT GGG CGG CCT TCG CCT<br>GTT C          |
| MtaLonA_L205A/V209A/V213A/M217A_F | GCT GAT AAA AGG GCC GCC CAG CGG GCC AAA GAA CAG GCG<br>GAC ACC AAC CA |

MtaLonA\_L205A/V209A/V213A/  
M217A\_R

GCC TGT TCT TTG GCC CGC TGG GCG GCC CTT TTA TCA GCC  
TCG AAG CGC TC
